# Supplementary material
Source: publisher figshare collection journal article supplement (https://gsapubs.figshare.com/ndownloader/files/23299199)
Supplement: Supplementary file 1 [file 23299199]

## Sheet: GDGT data
Section	Sample Name	Stratigraphic Level (m)	Age (Ma)	GDGT-Ic (1018)	GDGT-Ib (1020)	GDGT-Ia (1022)	GDGT-IIc (1032)	GDGT-IIb (1034)	GDGT-IIa (1036)	GDGT-IIIc (1046)	GDGT-IIIb (1048)	GDGT-IIIa (1050)	GDGT-4 (1292)	GDGT-4' (1292')	GDGT-3 (1296)	GDGT-2 (1298)	GDGT-1 (1300)	GDGT-0 (1302)	BIT Index	MBT'	CBT	MAT
Subachoque	081311-01	0	2.79133	135309	412808	9690379	38819.2	122456	5.86459e+06			588586	458444	173948	69635.4	187162	59257.6	136005	0.972386	0.60752	1.4633	11.3462
Subachoque	1SUB 1	1	2.581	262728	172325	1.72379e+06	76604.5	66306.2	515487	42163.8	13053.8	32918.6								0.757446	0.97238	18.7774
Subachoque	1SUB 1	1	2.581	259217	140113	1.66912e+06	73272.1	67771.8	515141	42647.9	11800.2	29791.3								0.750955	1.02148	18.2978
Subachoque	2SUB 1.1	1.1	2.55997	1.5869e+06	5.41262e+06	60631252	515795	938502	16844022	235204	144284	1.35368e+06	39235.2	9329.7	9004.7	39989.7	40451.7	73731.8	0.999503	0.774847	1.08631	18.6709
Subachoque	081311-02	3.5	2.05517	43098	102932	1.17617e+06	44706.7	55657.7	483515	55948.9	34399.3	45634.6	12435.4	2585.7	1505.9	14533.2	13515.3	90081.7	0.992761	0.677456	1.01975	16.0292
Subachoque	081311-03	5.5	1.755	167483	223148	677709	182071	111193	332037	15437.3	27883.2	92517.4								0.598122	0.480023	16.63
Subachoque	2SUB 14.25	14.25	1.4925	1290	2894	27779.8	1378	1695.9	14094.2		1130.5	3194.9								0.61085	0.960141	14.3023
Subachoque	2SUB 15.5	15.5	1.455	4309	5623.7	62125.5	7121.9	3437.2	48898.7			4419.9								0.53009	1.08825	11.0724
Subachoque	2SUB 50	50	0.42	106784	26013	539546	73882.9	18584.1	259213			17042.6								0.645822	1.25311	13.7253
Subachoque	2SUB 50	50	0.42	106904	24198.9	531408	72522.6	17218	261242			18605.6								0.641906	1.2819	13.4407
Guasca	2GUA 0.5	0.5	3.794	23581	35660.3	526454	19471	33130.5	188251	1740	3289.8	19103.9								0.692596	1.0166	16.5164
Guasca	2GUA 0.5	0.5	3.794	47998.1	6869.5	1.00663e+06	37781.4	65445.5	375343	3731.2	6880.7	38244.3								0.672552	1.28127	14.3943
Guasca	2GUA 0.5	0.5	3.794	124977	187478	2.75122e+06	100260	179985	1.00279e+06	9655.8	1833306	97972.5	5208.5					9435.8	0.99865	0.68929	1.00928	16.4554
Guasca	1GUA 1	1	3.765	94641.7	67362.5	340302	116359	61965.9	100876	13296.6	4265.3	9154.8								0.635299	0.53292	17.4826
Guasca	1GUA 1	1	3.765	95437.4	62648.7	352699	117055	61007.8	102251	13021.5	4244.9	8926.1								0.638461	0.565747	17.3945
Guasca	1GUA 1	1	3.765	111426	73216.2	405704	134346	69203.2	116062	13597.7	3121.6	10057.7	1419.9			1284.6	1359.9	5152.8	0.997337	0.64167	0.563906	17.5044
Guasca	081211-02	4	3.591	72880.4	819332	850138	40361.4	183736	409049			76425.3	15248.8	2057.1	5586.6	10802.2	7208.7	16395.7	0.988712	0.710606	0.09876	22.2788
Guasca	1GUA 4.1	4.1	3.5852	14785.5	10817.2	498874	15603.9	8222.1	113035	1480.3	1749.2	7646.9								0.783989	1.50704	16.5688
Guasca	1GUA 4.1	4.1	3.5852	14408.9	10754.7	500963	17223.6	8444.7	113712	1565.1	2037.6	10133.7								0.778708	1.50536	16.4146
Guasca	1GUA 4.1	4.1	3.5852	10564.6	8031.4	340153	9450.3	5803.8	71284.6	1037		5474.4	2982.2				1131	8843.4	0.992898	0.795872	1.47332	17.1283
Guasca	081211-03	4.5	3.562	12417.6	40744.3	310371	10312	23135.6	133944			19529	12204.3			6675.8	8008.8	18247.1	0.974363	0.660424	0.842327	16.5071
Guasca	1GUA-8.1	8.1	3.3532	2218.2	1712.4	13370.8	6099.5	3697.1	7318.3	1507.7		1309	5008.6					4962.3	0.814542	0.48429	0.582584	12.5197
Guasca	2GUA 11.1	11.1	3.1792	2201.2	5064.5	70190.3	9694.4	4106.9	29467.9			2632.9								0.627896	1.03608	14.4002
Guasca	1GUA 15.1	15.1	2.8564	6581.1	2103.2	118181	9337.1	3107.9	43514	2572.8	2158.9	7441.7								0.666778	1.49177	13.0218
Guasca	081211-08	17	2.63837	35656.3	73881.9	2.30692e+06	22012.2	32216	795923			102356	44230.3	3538.2	8826.8	21095.9	16948.9	55130.9	0.986388	0.71727	1.46605	14.7329
Guasca	081211-09	18	2.53893	39576.2	44385.2	283364	37840.4	34966.9	137214			16025.9	28936.8		4156.8	9021.6	6521.1	34811.6	0.937843	0.619047	0.724288	15.8937
Guasca	081211-10	22	2.2024	94479.6	97670	541003	69392.6	57055.2	167775			21071.5	21121	2341.3	8872.6	10182.2	8998.5	23366.6	0.971875	0.699275	0.660949	18.7399
Guasca	081211-11	23.5	2.0762	94954	94839.2	488533	45623.4	69764.4	273065			64976.6	15269.9			11914.7		12672.6	0.981861	0.599358	0.665286	15.6179
Guasca	081211-12	26	1.862	28971.2	64131.3	455334	48506.5	52337.4	175176			26564	20873.8	4614.1	13526.4	40689.9	28306.2	51067.2	0.96921	0.644446	0.733483	16.629
Tequendama	1TEQ 3.95	3.95	7.56445	8786.9	42785.6	950640		6002.6	112903			47606.1								0.857527	1.33844	19.8044
Tequendama	1TEQ 4.3	4.3	7.5473	53421.9	170296	7.20487e+06	6290.3	52584.8	638742											0.914152	1.54644	20.3804
Tequendama	1TEQ 4.4	4.4	7.5424	97425.2	370081	7.96132e+06	15097.3	107936	984817			217761								0.864102	1.27219	20.3838
Tequendama	1TEQ 4.4	4.4	7.5424	97249.4	395030	8346208	18201	118683	1.09911e+06			228576								0.857851	1.2645	20.2337
Tequendama	1TEQ 4.4	4.4	7.5424	317691	1.19836e+06	25469126	59775.7	347628	3140639		31198	571585								0.867557	1.26731	20.5186
Tequendama	1TEQ 4.9	4.9	7.5179	137292	368962	8406044	22202.5	87280.8	891920		11793.2	217207								0.879714	1.30919	20.658
Tequendama	1TEQ 4.9	4.9	7.5179	128250	318783	7.49062e+06	19762.1	77650.8	759848		12087.5	200209								0.88244	1.31831	20.6908
Tequendama	1TEQ 4.9	4.9	7.5179	233553	629350	14707231	57600.9	172693	1.59901e+06	15866.2	32586.8	414158								0.874059	1.30816	20.4886
Tequendama	1TEQ 7.1	7.1	7.4101	149216	343407	12913524	19592.6	69932	1.66376e+06			689875								0.845851	1.54737	18.2578
Tequendama	1TEQ 7.1	7.1	7.4101	127528	301933	11482012	17093.1	68542.2	1.48984e+06		24984.5	588100								0.846283	1.54424	18.2889
Tequendama	1TEQ 7.1	7.1	7.4101	219064	603078	19062052	75711.5	177336	2501175	75607.5	122138	1.14005e+06								0.836227	1.44139	18.5604
Tequendama	1TEQ 8.1	8.1	7.3611	35763.1	141121	4.83739e+06	24945.7	36144.5	320068			106382								0.911386	1.46381	20.7631
Tequendama	TEQ12-01	11	7.219	467956	593624	20947900	76489.5	417642	3.9115e+06			954280	846776	164804	374629	1.06449e+06	771391	3191801	0.968239	0.804164	1.39063	17.8542
Tequendama	TEQ12-04	14	7.13083	142024	79079	18909866	74735	51790.8	769210			119801	46434.8	4196.2	107242	221146	250881	2.39518e+06	0.99766	0.949592	2.17717	17.9028
Tequendama	TEQ12-05	15	7.11125	357869	158365	5278717	113298	83470.9	664431			51859	44576.4	8039.2	260780	452186	548696	4.90967e+06	0.992619	0.863885	1.3905	19.7063
Tequendama	TEQ12-06	16	7.09167	214833	349461	5.66927e+06	173754	190004	3030906	90480	54133.8	479311	190446	20052.7	453239	907586	721472	1.813e+06	0.979675	0.616724	1.20756	13.0816
Tequendama	TEQ12-07	17	7.07208	334926	323385	9249799	84180.2	158729	3.26494e+06			322412	542567	16333.8	272369	545124	406021	788263	0.959449	0.7212	1.41427	15.1483
Tequendama	TEQ12-08	18	7.0525	172503	227481	5524434	78350.8	88953.8	1.91846e+06	28558.6	23326.2	120617	409800	20772.8	385013	743032	745172	3.41649e+06	0.948604	0.728639	1.37146	15.6217
Tequendama	TEQ12-10	20	7.01333	796684	409108	17130084	197925	167829	2.98565e+06			798420	58455.8	8156.8	770027	768288	803928	10204426	0.997213	0.815446	1.54241	17.3434
Tequendama	TEQ12-11	21	6.99375	282257	129402	8.15676e+06	70035.4	57950.3	663768			73132.5	96371.4	11673.9	393415	245991	166766	933480	0.98928	0.908316	1.67284	19.4828
Tequendama	TEQ12-13	23	6.95458	161704	67732.3	3107091	24998	20116.2	111427			10392.5	14556.2	1547.1	67688.7	64426.5	50599.8	342969	0.995512	0.952352	1.56392	21.4655
Tequendama	TEQ12-14	24	6.935	415291	398228	66775.4	52279.5	96355.2	1.47987e+06			231147	167694	22391.5	591905	764405	431249	2.2464e+06	0.913803	0.321281	0.495152	7.96221
Tequendama	TEQ12-15	25	6.89626	635925	250706	12970233	189040	117907	507899			48886.4	21556.2	6441.5	296964	263664	226960	1280159	0.998409	0.941325	1.56306	21.1285
Tequendama	TEQ12-19	29	6.74132	18002.2	43781.5	431275	2641	47330.1	151472			35659	12722.8					43539.7	0.979841	0.675274	0.805906	17.174
Tequendama	TEQ12-22	32	6.62511	556503	210650	7227222	118307	79901.1	275833			30201.1	43312.3	5810.9	93919.1	74228.4	65594.4	291972	0.994283	0.940668	1.41202	21.9646
Tequendama	TEQ12-27	37	6.43142	6587.7	20533.3	170480	5522.7	10614.3	125035			14929.2	6180.4		2407.6	6520.8	7098.8	18735.4	0.98048	0.558665	0.977154	12.5881
Tequendama	TEQ12-33	43	6.199	161573	114509	9457501	21532.9	63155.5	814756		29591.9	37636.8	42604.4	3947.6	41076.6	66227	47542.6	105845	0.995885	0.912182	1.76206	19.0967

## Sheet: dD data
								C27 n-alkane			C29 n-alkane			C31 n-alkane			C33 n-alkane
Section	Sample Name	Run #	Strat Level (m)	Age (Ma)	Age Range (Ma)	Avg amt of analyte (ng)	CPI	δD (‰VSMOW)	Retention Time (sec)	Peak Height (m/z = 2; mV)	δD (‰VSMOW)	Retention Time (sec)	Peak Height (m/z = 2; mV)	δD (‰VSMOW)	Retention Time (sec)	Peak Height (m/z = 2; mV)	δD (‰VSMOW)	Retention Time (sec)	Peak Height (m/z = 2; mV)
Subachoque	081311-09	7505	47	0.51	0	441.9	2.78	-171.2	2104.6	918	-171	2353.5	1254	-169.8	2596.6	1135	-	-	-
Subachoque	081311-01	7518	0	2.79	0	992.25	3.68	-	-	-	-174.9	2353.3	1159	-165.9	2596.6	1143	-	-	-
Subachoque		7526						-	-	-	-	-	-	-	-	-	-	-	-
Guasca	081211-15+16	7528	37.5	0.85	0.18	715.79	2.95	-175.9	2110.7	3141	-148.8	2359.2	3059	-150.1	2602.1	2846	-146.9	2834.7	1916
Guasca	081211-13	7496	31.5	1.38	0	1550.05	3.18	-177.8	2116.3	5599	-177.5	2327.4	7962	-177	2613.8	6594	-165	2839.3	3219
Guasca	081211-10+11+12	7504	23.5	2.08	0.17	927.46	1.94	-164.8	2111.7	3442	-165	2361.1	3602	-169.6	2603.9	3083	-173.6	2835.5	1649
Guasca	081211-07+08+09	7546	17	2.64	0.11	907.27	2.87	-140.2	2114.7	4799	-148.7	2365.3	5213	-133.4	2608.7	4807	-131.3	2841.6	2975
Guasca	081211-03+04+05	7544	13	3.07	0.29	597.07	2.23	-170.2	2111.7	4169	-168.4	2363.2	4571	-162.4	2604.3	3024	-148.6	2834.7	1063
Guasca	081211-01+02	7516	3.5	3.62	0.03	741.69	2.17	-163.3	2110.3	2554	-165.9	2362.5	4058	-161.2	2605.6	3788	-146.1	2836.3	2184
Tequendama	TEQ12-33	7515	43	6.2	0	617.67	2.33	-170.3	2110.9	3497	-171.8	2362.1	4460	-164.4	2607.9	5082	-153.6	2836.8	2940
Tequendama	TEQ12-32	7522	42	6.24	0	1840.55	2.52	-162.3	2119.9	6979	-151.3	2369.9	6386	-148.1	2618.4	7703	-142.6	2846.2	5610
Tequendama	TEQ12-17+18	7545	27.5	6.8	0.02	553.96	1.43	-127.6	2108.6	3156	-128.1	2359.6	3649	-139.6	2603.7	3502	-133.2	2836.3	2810
Tequendama	TEQ12-08+09B+10	7517	19	7.03	0.02	907.27	2.85	-161.2	2108.2	1984	-175.7	2363	4413	-163.9	2602.1	2457	-153.8	2833.2	1431
Tequendama	TEQ12-07	7514	17	7.07	0	4530.82	6.7	-185.3	2118	6488	-175.7	2387.4	12678	-179.7	2616.7	6819	-197.7	2850.8	3405
Tequendama		7525						-182.4	2114.9	5438	-181.8	2381.3	11808	-188.3	2612.3	6347	-192.7	2837.2	2705
Tequendama	TEQ12-03	7529	13	7.15	0	1021.43	5.2	-153.4	2106.3	1218	-171.8	2365	5549	-175.6	2622.9	10498	-175.1	2858.9	6880
Tequendama	TEQ12-02	7493	12	7.17	0	5642.29	0.85	-119.6	1878.3	5440	-122.3	2127.4	4490	-137	2369.9	3587	-130.7	2599.3	2050
Tequendama		7494						-121.6	2113.8	4528	-122.4	2361.5	3706	-139.9	2603.1	2987	-130	2833.2	1608
Tequendama	TEQ12-01	7495	11	7.22	0	1379.13	3.96	-150.6	2110.1	3008	-156.1	2365.7	5402	-158.8	2615.8	7498	-151	2842.4	4366
Tequendama		7506						-149.5	2106.9	1906	-156.4	2360.2	3695	-159.6	2608.3	5235	-153	2836.5	2937
KEY:
	Disqualified measurements; peak amplitude is < 2000 mV or > 10000 mV
	Samples with CPI < 2
-	Concentrations too low for peak integration

## Sheet: PMag data
Section	Sample #	Strat level (meters from base)	Declination (°)	Inclination (°)	MAD (°)	Classification	Mean Dec (°)	Mean Inc (°)	Avg Angular Difference (°)
Subachoque	2SUB0A	0	3.6	9.1	16.8	A	0.666667	12.7	30.062
Subachoque	2SUB0B	0	-12.6	34.1	8.8						KEY:
Subachoque	2SUB0C	0	11	-5.1	8.8							Measurements with MAD >20; not included in final calculations
Subachoque	2SUB1A	1	203.5	-3.4	4.6	A	195.9	-9.76667	14.4797
Subachoque	2SUB1B	1	191.2	-19.2	6.2
Subachoque	2SUB1C	1	193	-6.7	4.4
Subachoque	2SUB2A	2	205.7	-8.4	15.6	A	200.233	-16.8667	13.1193
Subachoque	2SUB2B	2	196.3	-16.9	8.3
Subachoque	2SUB2C	2	198.7	-25.3	7.4
Subachoque	2SUB3A	3	196.3	0.5	13.4	A	185.9	-5.8	22.4604
Subachoque	2SUB3B	3	173.2	-20.8	14.3
Subachoque	2SUB3C	3	188.2	2.9	8.5
Subachoque	2SUB4A	4	-55.7	-31	4.5	A	-43.2667	-25.6333	26.4201
Subachoque	2SUB4B	4	-19	-27.7	7
Subachoque	2SUB4C	4	-55.1	-18.2	18.1
Subachoque	2SUB5A	5	186.9	33.3	11.6	A	194.2	23.6333	47.1179
Subachoque	2SUB5B	5	197.8	-15.9	18.1
Subachoque	2SUB5C	5	197.9	53.5	19.6
Subachoque	2SUB6A	6	202.2	51	16.5	B	209.65	33.4	37.1759
Subachoque	2SUB6B	6	217.1	15.8	12.3
Subachoque	2SUB6C	6	-58.4	72	41.1
Subachoque	2SUB7A	7	184.5	10.8	3.9	A	189.7	6.5	25.5734
Subachoque	2SUB7B	7	184.2	-11.8	9.9
Subachoque	2SUB7C	7	200.4	20.5	4.2
Subachoque	2SUB9A	9	195.4	18	17.1	A	196.967	17.6667	22.7024
Subachoque	2SUB9B	9	179.9	16.5	19.3
Subachoque	2SUB9C	9	215.6	18.5	9.6
Subachoque	2SUB11A	11	205.3	16.9	9.5	A	201.933	10.8	24.1166
Subachoque	2SUB11B	11	217.3	10.9	8.3
Subachoque	2SUB11C	11	183.2	4.6	14.8
Subachoque	2SUB13A	13	194.1	25.3	4.5	A	194.133	17.7667	25.4424
Subachoque	2SUB13B	13	185.6	-2.9	13.6
Subachoque	2SUB13C	13	202.7	30.9	6.3
Subachoque	2SUB15A	15	202.9	9.1	15.2	A	184.867	5.56667	26.0419
Subachoque	2SUB15B	15	165.9	8.4	8.9
Subachoque	2SUB15C	15	185.8	-0.8	5.2
Subachoque	2SUB17A	17	6	20.6	7.6	B	2.3	12.65	17.4515
Subachoque	2SUB17B	17	238.3	3.4	22.8
Subachoque	2SUB17C	17	-1.4	4.7	5.5
Subachoque	2SUB19A	19	196.6	22.5	9.8	A	196.7	18.7667	6.17834
Subachoque	2SUB19B	19	193.9	15.6	19.4
Subachoque	2SUB19C	19	199.6	18.2	4.9
Subachoque	2SUB21A	21	204.6	4.9	8	A	202.5	14.3	14.7783
Subachoque	2SUB21B	21	205.8	24.3	10.3
Subachoque	2SUB21C	21	197.1	13.7	2.9
Subachoque	2SUB23A	23	219.3	3.5	8.3	A	202.967	5.96667	24.4765
Subachoque	2SUB23B	23	187.4	15.5	17.8
Subachoque	2SUB23C	23	202.2	-1.1	13.2
Subachoque	2SUB25A	25	36.9	17	12.5	B	151.2	28.8333	85.2065
Subachoque	2SUB25B	25	208.5	34.6	10.4
Subachoque	2SUB25C	25	208.2	34.9	4.9
Subachoque	2SUB27A	27	211.8	3	13	A	178.433	16.7333	60.7519
Subachoque	2SUB27B	27	201.1	23.5	14
Subachoque	2SUB27C	27	122.4	23.7	16.7
Subachoque	2SUB29A	29	170.8	-59.5	35.9	B	204.15	7.95	23.9129
Subachoque	2SUB29B	29	193.1	3.1	6.6
Subachoque	2SUB29C	29	215.2	12.8	17.7
Subachoque	2SUB31A	31	182.4	18.8	5.7	A	189.233	16.4333	14.9123
Subachoque	2SUB31B	31	185.7	9.1	10.1
Subachoque	2SUB31C	31	199.6	21.4	6.4
Subachoque	2SUB33A	33	195.8	27.4	5	A	193.7	18.9667	18.9056
Subachoque	2SUB33B	33	180.8	14.4	10.4
Subachoque	2SUB33C	33	204.5	15.1	2.3
Subachoque	2SUB35A	35	197.4	7.5	16.4	A	198.033	2.83333	9.53711
Subachoque	2SUB35B	35	194.6	5.4	13.7
Subachoque	2SUB35C	35	202.1	-4.4	11.3
Subachoque	2SUB37A	37	199.9	11.9	17.5	A	184.667	2.16667	37.036
Subachoque	2SUB37B	37	171.6	18.4	14
Subachoque	2SUB37C	37	182.5	-23.8	10.2
Subachoque	2SUB39A	39	14.5	-11.7	13	B	-0.4	-10.45	29.3985
Subachoque	2SUB39B	39	-15.3	-9.2	17.2
Subachoque	2SUB39C	39	-5.4	18.4	21.9
Subachoque	2SUB41A	41	17	-15.5	7.3	A	29.3	-13.4667	15.5277
Subachoque	2SUB41B	41	37.8	-16.5	12.1
Subachoque	2SUB41C	41	33.1	-8.4	11.7
Subachoque	2SUB43A	43	27.9	-0.3	4.5	A	20.5	-0.266667	10.8941
Subachoque	2SUB43B	43	18.8	-4.3	8.1
Subachoque	2SUB43C	43	14.8	3.8	10.9
Subachoque	2SUB44.5A	44.5	0.6	-39.1	3.8	A	-1.26667	-45.1667	16.3418
Subachoque	2SUB44.5B	44.5	10.4	-54.2	8.9
Subachoque	2SUB44.5C	44.5	-14.8	-42.2	6.5
Subachoque	2SUB47C	47	79	26.8	44.1
Subachoque	2SUB47A	47	176.5	-62	29
Subachoque	2SUB47B	47	215.2	-6.8	36.8
Subachoque	2SUB47C	47	22.1	-24.4	40.3
Subachoque	2SUB49A	49	98.6	44.6	9.1	A	103.467	46.3	43.6209
Subachoque	2SUB49B	49	155.6	51.4	7.7
Subachoque	2SUB49C	49	56.2	42.9	14.3
Guasca	2GUA0A	0	85	-37.2	33.2	B	24.9	1.3	15.0231
Guasca	2GUA0B	0	20.8	7.6	2.3
Guasca	2GUA0C	0	29	-5	12.3
Guasca	2GUA1A	1	0.2	-7.7	16.8	A	-2.36667	-2.56667	15.7254
Guasca	2GUA1B	1	6.8	-1.8	7.4
Guasca	2GUA1C	1	-14.1	1.8	12.8
Guasca	2GUA2A	2	16.8	-9.3	8.3	B	16.35	6.6	31.8122
Guasca	2GUA2B	2	15.9	22.5	10.8
Guasca	2GUA3A	3	189.8	7.2	32	B	11.7	12.55	61.3905
Guasca	2GUA3B	3	22.1	41.7	16.5
Guasca	2GUA3C	3	1.3	-16.6	11.3
Guasca	2GUA4A	4	39.8	-16.5	14.3	A	8.4	-6.4	47.9912
Guasca	2GUA4B	4	-16.9	-19.3	14.6
Guasca	2GUA4C	4	2.3	16.6	19
Guasca	2GUA5A	5	14.3	-1.5	29.2	C	28.7	19.2	99.7378
Guasca	2GUA5B	5	-22.5	-0.1	15.4
Guasca	2GUA5C	5	79.9	38.5	18.8
Guasca	2GUA6A	6	41.4	28.1	19.2	A	44.8	-6.53333	42.5829
Guasca	2GUA6B	6	56.7	-29.5	13.7
Guasca	2GUA6C	6	36.3	-18.2	15.6
Guasca	2GUA7A	7	12.4	5.6	4.9	A	18.4333	12.7	14.3841
Guasca	2GUA7B	7	18	21.7	5.7
Guasca	2GUA7C	7	24.9	10.8	13.1
Guasca	2GUA8A	8	16.1	44.5	12.9	A	13.1	28.4333	28.5137
Guasca	2GUA8B	8	15.2	3.2	10.5
Guasca	2GUA8C	8	8	37.6	9.5
Guasca	2GUA9A	9	219	-10.4	16.8	A	216.967	-7.96667	7.11956
Guasca	2GUA9A	9	217.4	-11.5	15.6
Guasca	2GUA9B	9	212.1	43.3	25.4
Guasca	2GUA9C	9	214.5	-2	14.6
Guasca	2GUA10A	10	142.5	37.7	40.3	C	255.4	57.2	-1
Guasca	2GUA10B	10	238.2	31.6	37.3
Guasca	2GUA10C	10	255.4	57.2	17.6
Guasca	2GUA11A	11	119.9	59.4	21.6	C	139.35	2.8	154.865
Guasca	2GUA11B	11	241.7	-4.2	9.7
Guasca	2GUA11C	11	34	5.3	25.5
Guasca	2GUA11C	11	37	9.8	12
Guasca	2GUA12A	12	150.6	-44.7	27.2	C	70.5	-59.8	-1
Guasca	2GUA12B	12	110.7	-74.3	35
Guasca	2GUA12C	12	70.5	-59.8	13.4
Guasca	2GUA13A	13	81	-38.6	17.9	B	187.867	-37.2333	78.5735
Guasca	2GUA13B	13	237.3	-51.3	14.7
Guasca	2GUA13C	13	245.3	-21.8	11.4
Guasca	2GUA14A	14	33	2.5	28.9	C	6.2	-30.2	-1
Guasca	2GUA14B	14	58.1	-48.4	23.5
Guasca	2GUA14C	14	6.2	-30.2	16.9
Guasca	2GUA15A	15	263.1	20.9	28.3
Guasca	2GUA15B	15	-71.8	10.3	25.7
Guasca	2GUA15C	15	13.9	-10.9	25.4
Guasca	2GUA16A	16	19.7	25.5	10.6	B	-9.5	13.3333	62.4696
Guasca	2GUA16B	16	20.5	22.6	12.2
Guasca	2GUA16C	16	-68.7	-8.1	12.5
Guasca	2GUA17A	17	61.6	29.7	9	C	61.6	29.7	-1
Guasca	2GUA17B	17	66.9	-4	23.2
Guasca	2GUA17C	17	55.6	-46.4	24.6
Guasca	2GUA18A	18	-77.3	-35.3	41.1	C	120.2	-31.65	90.1561
Guasca	2GUA18B	18	70.1	-56.9	6.7
Guasca	2GUA18C	18	170.3	-6.4	15.6
Guasca	2GUA19A	19	185.3	17.6	42.7
Guasca	2GUA19B	19	163.3	73.2	21.2
Guasca	2GUA19C	19	-80.5	2.3	36
Guasca	2GUA20A	20	109.3	-28.6	34.9	B	10.8	-3.3	28.822
Guasca	2GUA20B	20	22.2	-12.2	10.9
Guasca	2GUA20C	20	-0.6	5.6	17.1
Guasca	2GUA21A	21	184.2	5.6	8	B	122.933	-17.4	104.136
Guasca	2GUA21B	21	-19.1	-18.2	18
Guasca	2GUA21C	21	203.7	-39.6	5.6
Guasca	2GUA22A	22	183.5	-26.3	7.7	A	172.2	-9.53333	38.8321
Guasca	2GUA22B	22	143.8	0.3	17.6
Guasca	2GUA22C	22	189.3	-2.6	12
Guasca	2GUA23A	23	217.3	3.5	19.7	C	217.3	3.5	-1
Guasca	2GUA23B	23	-60.6	15.5	38.2
Guasca	2GUA23C	23	257.1	49.6	36.6
Guasca	2GUA24A	24	-5.5	19.5	24.5	C	118.4	-7.1	157.834
Guasca	2GUA24B	24	198.6	-36.2	10.5
Guasca	2GUA24C	24	38.2	22	19.6
Guasca	2GUA25A	25	180.2	-31.5	8.3	B	129.633	-15.2667	110.218
Guasca	2GUA25B	25	192.4	-13.4	5.4
Guasca	2GUA25C	25	16.3	-0.9	15
Guasca	2GUA26A	26	26.1	17	32.3	C	2.3	-1.7	-1
Guasca	2GUA26B	26	2.3	-1.7	16.7
Guasca	2GUA26C	26	-2	14.4	38.5
Guasca	2GUA27A	27	69.3	-8.1	32.4	C	-17.7	25.1	-1
Guasca	2GUA27B	27	-17.7	25.1	10
Guasca	2GUA27C	27	-8.1	28.6	27.8
Guasca	2GUA28A	28	237.8	25.9	39.2	C	-49.4	32.4	-1
Guasca	2GUA28B	28	264.2	37	34.7
Guasca	2GUA28C	28	-49.4	32.4	19.5
Guasca	2GUA29A	29	71.8	21.5	35.9	B	10.15	26.15	40.0553
Guasca	2GUA29B	29	20.8	43.9	11.6
Guasca	2GUA29C	29	-0.5	8.4	13.7
Guasca	2GUA30A	30	76.5	71.1	31.3	C	160.3	64.2	-1
Guasca	2GUA30B	30	160.3	64.2	17.1
Guasca	2GUA30C	30	-14.8	24.1	31.3
Guasca	2GUA31A	31	-11.9	25	3.9	A	-2.56667	26.4	13.0568
Guasca	2GUA31B	31	8.1	24.1	3.6
Guasca	2GUA31C	31	-3.9	30.1	5.8
Guasca	2GUA32A	32	172.2	-23.7	11.2	B	50.5	-11.8	106.43
Guasca	2GUA32B	32	-21.2	-2.8	8.4
Guasca	2GUA32C	32	0.5	-8.9	9.8
Guasca	2GUA33A	33	265.2	16.4	12.7	A	262.8	11.7	7.50209
Guasca	2GUA33B	33	258.6	8.8	6.9
Guasca	2GUA33C	33	264.6	9.9	4.7
Guasca	2GUA34A	34	-47.2	23.1	21.3	C	135.8	-12.3	-1
Guasca	2GUA34B	34	135.8	-12.3	19.5
Guasca	2GUA34C	34	-83.3	36.8	32.2
Guasca	2GUA35A	35	158.5	-32.8	27	C	47.2	-34.2	-1
Guasca	2GUA35B	35	47.2	-34.2	16.5
Guasca	2GUA35C	35	39.4	-28.3	40.2
Guasca	2GUA36A	36	218	-30.3	22.1	C	174	-2.1	-1
Guasca	2GUA36B	36	-47.6	-37.2	34.4
Guasca	2GUA36C	36	174	-2.1	10
Guasca	2GUA37A	37	26.2	19.3	15.2	C	26.2	19.3	-1
Guasca	2GUA37B	37	108	-49.8	22.6
Guasca	2GUA37C	37	217.4	18.2	27.8
Guasca	2GUA38A	38	239.5	51	20	B	206.15	3.65	19.5281
Guasca	2GUA38B	38	202	12.5	15.9
Guasca	2GUA38C	38	210.3	-5.2	17.6
Guasca	2GUA39A	39	225.8	-26.7	31.5	B	202.3	-3.85	72.0638
Guasca	2GUA39B	39	228.6	21.8	12
Guasca	2GUA39C	39	176	-29.5	16.9
Guasca	2GUA40A	40	-0.7	-11.8	22.5	B	31.85	5.95	27.777
Guasca	2GUA40B	40	30.8	-7.9	10.3
Guasca	2GUA40C	40	32.9	19.8	17.8
Tequendama	1TEQT1A	1.75	146.2	15.7	13.1	B	136.725	22.45	79.2161
Tequendama	1TEQT1B	1.75	213.5	25.4	8.9
Tequendama	1TEQT1C	1.75	-17.1	65	4.9
Tequendama	1TEQT1D	1.75	204.3	-16.3	8
Tequendama	1TEQT2A	3.75	-24.5	15.5	10.2	B	99.2	-0.025	102.519
Tequendama	1TEQT2B	3.75	267.9	-11.4	10.9
Tequendama	1TEQT2C	3.75	164.4	22.1	13.9
Tequendama	1TEQT2D	3.75	-11	-26.3	12.9
Tequendama	1TEQT3A	8	248.1	10.2	30	A	169.1	22.3667	58.8025
Tequendama	1TEQT3B	8	142.8	-21.6	16.9
Tequendama	1TEQT3C	8	186.4	32.3	15.2
Tequendama	1TEQT3D	8	178.1	56.4	10.1
Tequendama	1TEQT4A	4	175.5	-29.3	2.5	C	70.05	-18.95	131.813
Tequendama	1TEQT4B	4	-8.9	-20.8	36.3
Tequendama	1TEQT4C	4	159.7	-6.2	35.6
Tequendama	1TEQT4D	4	-35.4	-8.6	19
Tequendama	1TEQT5A	5	-4.7	6.9	15.2	B	-21.05	13.7	75.066
Tequendama	1TEQT5B	5	-63.9	-3.8	9.8
Tequendama	1TEQT5C	5	51.1	6	13.5
Tequendama	1TEQT5D	5	-66.7	45.7	19.1
Tequendama	1TEQT6A	6	66.7	77.4	6.9	B	31.475	60.45	52.518
Tequendama	1TEQT6B	6	-38.3	32.1	8
Tequendama	1TEQT6C	6	-19.9	87.4	11.2
Tequendama	1TEQT6D	6	117.4	44.9	5.4
Tequendama	1TEQT7A	7	191.4	27.9	11.3	A	151	4.2	74.3471
Tequendama	1TEQT7B	7	106.2	21.2	18.7
Tequendama	1TEQT7C	7	252.2	6.1	26.6
Tequendama	1TEQT7D	7	155.4	-36.5	11.3
Tequendama	1TEQT8A	9	-19.1	-2	11.5	B	82.875	-12.1	94.1288
Tequendama	1TEQT8B	9	71.5	30.9	12.9
Tequendama	1TEQT8C	9	255.3	-42.9	14.1
Tequendama	1TEQT8D	9	23.8	-34.4	7.3
Tequendama	1TEQT9A	10	222.9	-65.2	32.9	B	62.95	40.9	79.5712
Tequendama	1TEQT9B	10	186.1	50.9	14.2
Tequendama	1TEQT9C	10	-60.2	30.9	15.3
Tequendama	1TEQT10A	11	148.3	19.5	10.1	B	134.7	-0.5	48.0559
Tequendama	1TEQT10B	11	121.1	-20.5	9.8
Tequendama	1TEQT10C	11	229.4	-70.7	20.9
Tequendama	1TEQT10D	11	187.9	46.5	33.8
Tequendama	1TEQT11A	12	33.9	26.1	7.2	B	-8.2	15.8667	89.3754
Tequendama	1TEQT11B	12	-82.3	54.7	9.9
Tequendama	1TEQT11C	12	-68.8	0	28
Tequendama	1TEQT11D	12	23.8	-33.2	8.4
Tequendama	1TEQT12A	13	-29.5	38	17.8	B	-10	8.35	69.7005
Tequendama	1TEQT12C	13	9.5	-21.3	11.9
Tequendama	1TEQT13A	14	-46.6	54.1	13.6	A	-24.075	44.45	30.1887
Tequendama	1TEQT13B	14	-44.4	32.3	6.4
Tequendama	1TEQT13C	14	-19.1	34.7	10.1
Tequendama	1TEQT13D	14	13.8	56.7	4.2
Tequendama	1TEQT14A	15	80	26.9	7.6	B	165.15	54.9	70.104
Tequendama	1TEQT14B	15	-58	13.9	25.4
Tequendama	1TEQT14C	15	250.3	82.9	7.3
Tequendama	1TEQT14D	15	-47.7	3.5	33.3
Tequendama	1TEQT15A	16	-36.2	32.5	10.4	B	-4.05	31.9	53.7258
Tequendama	1TEQT15B	16	-59	12.5	30.5
Tequendama	1TEQT15C	16	223.2	17	25.8
Tequendama	1TEQT15D	16	28.1	31.3	15.8
Tequendama	1TEQT16A	17	-18.9	39.6	39.2	C	52.6	45.7	-1
Tequendama	1TEQT16C	17	28.6	29.4	22.8
Tequendama	1TEQT16D	17	52.6	45.7	19.6
Tequendama	1TEQT17A	18.5	-72.8	21.5	16.2	C	-72.8	21.5	-1
Tequendama	1TEQT17B	18.5	-34	-53.6	24
Tequendama	1TEQT17C	18.5	18.8	9.9	26.1
Tequendama	1TEQT17D	18.5	-54.2	-13.9	28.8
Tequendama	1TEQT18A	19	173.9	33.8	15	B	104.775	27.925	71.7759
Tequendama	1TEQT18B	19	124.3	20.7	10.1
Tequendama	1TEQT18C	19	138.8	18.7	9.5
Tequendama	1TEQT18D	19	-17.9	38.5	14.4
Tequendama	1TEQT19A	20	-7.8	-34.2	8.8	A	-29.7	0.266667	58.4159
Tequendama	1TEQT19B	20	-39.3	43.4	9.3
Tequendama	1TEQT19C	20	-2.2	-1.3	22.7
Tequendama	1TEQT19D	20	-42	-8.4	12.3
Tequendama	1TEQT20A	21	42.1	55.4	16.4	B	64.05	26.6	67.8359
Tequendama	1TEQT20B	21	86	-2.2	9.2
Tequendama	1TEQT20C	21	-18.3	54.9	42.6
Tequendama	1TEQT22A	23	21.7	-9	12.4	B	60.9	12.1333	111.937
Tequendama	1TEQT22B	23	159.9	-15.6	10.8
Tequendama	1TEQT22C	23	1.1	61	16
Tequendama	1TEQT22D	23	259.8	40.2	24.8
Tequendama	1TEQT23A	24	39.6	25.6	18.5	B	119.433	23.8333	88.2645
Tequendama	1TEQT23B	24	76.4	-10.6	26.7
Tequendama	1TEQT23C	24	60.7	2.1	14
Tequendama	1TEQT23D	24	258	43.8	17.5
Tequendama	1TEQT24A	25	-30.1	-24.3	16.9	C	81.45	6.25	141.203
Tequendama	1TEQT24B	25	193	36.8	6.7
Tequendama	1TEQT24C	25	-84.8	26.8	22
Tequendama	1TEQT25A	26	229.4	31	11.2	A	88.325	50.025	66.7398
Tequendama	1TEQT25B	26	-45.7	36.5	9.5
Tequendama	1TEQT25C	26	73.3	82.3	5.5
Tequendama	1TEQT25D	26	96.3	50.3	18.2
Tequendama	1TEQT26A	27	-24.4	25.8	4.7	B	55.6	-2.73333	101.924
Tequendama	1TEQT26B	27	122.4	-38.4	5.9
Tequendama	1TEQT26C	27	116.6	39	29.1
Tequendama	1TEQT26D	27	68.8	4.4	14.1
Tequendama	1TEQT27A	28	52.7	0.3	18.4	B	113.9	-22.05	75.0511
Tequendama	1TEQT27B	28	136.3	-39.9	10.2
Tequendama	1TEQT27C	28	195	-49.8	18.7
Tequendama	1TEQT27D	28	71.6	1.2	13.1
Tequendama	1TEQT28A	29.5	164.7	20.9	13.8	B	106.5	-9.53333	83.0995
Tequendama	1TEQT28B	29.5	222.9	18.8	22.1
Tequendama	1TEQT28C	29.5	50.8	-47.4	14.7
Tequendama	1TEQT28D	29.5	104	-2.1	9.2
Tequendama	1TEQT30A	31	68.8	32.6	32.5
Tequendama	1TEQT30B	31	27.4	-11.4	26.7
Tequendama	1TEQT30C	31	236.3	48.8	31.5
Tequendama	1TEQT30D	31	-31.1	5.7	24.9
Tequendama	1TEQT31A	33.5	4.8	63.8	16.6	C	149.075	-0.1	110.155
Tequendama	1TEQT31B	33.5	228.5	-49.2	14.6
Tequendama	1TEQT31C	33.5	246.1	42.2	3
Tequendama	1TEQT31D	33.5	116.9	-57.2	4.7
Tequendama	1TEQT32A	34	-40.1	54.9	11.5	B	72.0333	9.1	119.876
Tequendama	1TEQT32B	34	78.6	32.8	6.1
Tequendama	1TEQT32C	34	177.6	-60.4	9.4
Tequendama	1TEQT33A	35	133	-22.1	11.2	B	99.825	-17.7	83.9103
Tequendama	1TEQT33B	35	178.9	-6.9	19.7
Tequendama	1TEQT33C	35	67.3	-1.2	10.1
Tequendama	1TEQT33D	35	20.1	-40.6	6.6
Tequendama	1TEQT34A	36	176.6	-57.3	9.6	C	44.85	-25.55	97.9693
Tequendama	1TEQT34B	36	-78.2	-47.3	6.3
Tequendama	1TEQT34C	36	95	14.4	9.5
Tequendama	1TEQT34D	36	-14	-12	17
Tequendama	1TEQT35A	37	7.8	38.1	8.6	A	-22.6	29.4667	59.2434
Tequendama	1TEQT35B	37	-9.9	55.6	13.9
Tequendama	1TEQT35C	37	70.1	39.5	24.8
Tequendama	1TEQT35D	37	-65.7	-5.3	9.1
Tequendama	1TEQT36A	38	181.6	67.2	7.1	B	21.9667	45.2333	71.5501
Tequendama	1TEQT36B	38	-60.3	71.4	10.6
Tequendama	1TEQT36C	38	-55.4	-2.9	7.9
Tequendama	1TEQT36D	38	115.9	52.9	26.4
Tequendama	1TEQT37A	39	4.8	32.8	11.1	A	46.0333	30.3333	47.0706
Tequendama	1TEQT37B	39	72.5	13.5	11.6
Tequendama	1TEQT37C	39	242.5	58.6	22.5
Tequendama	1TEQT37D	39	60.8	44.7	11.9
Tequendama	1TEQT38A	40	-0.8	-17.8	23.8	C	154.4	40.75	98.2279
Tequendama	1TEQT38B	40	71.4	0.6	13.6
Tequendama	1TEQT38C	40	232.5	-24	24.4
Tequendama	1TEQT38D	40	237.4	80.9	2.4
Tequendama	1TEQT39B	41	62.5	-50.8	8.5	B	42.75	-28.5	55.3522
Tequendama	1TEQT39C	41	12.2	51.6	35.1
Tequendama	1TEQT39D	41	23	-6.2	14.6
Tequendama	1TEQT40A	42	217	42.9	18.1	B	65.375	-13.65	99.8978
Tequendama	1TEQT40B	42	-19.2	-56.2	18.7
Tequendama	1TEQT40C	42	62.3	-5.5	17.9
Tequendama	1TEQT40D	42	1.4	-35.8	8.5
Tequendama	1TEQT41A	43	-77.4	-27.3	6.6	C	0.85	-6.6	154.435
Tequendama	1TEQT41B	43	-13.8	-72.7	20.3
Tequendama	1TEQT41C	43	79.1	14.1	18.4
Tequendama	1TEQT41D	43	-34.5	16.4	32.5
Tequendama	1TEQT42A	44	77.8	-43.6	16.9
Tequendama	1TEQT42B	44	18.4	42.2	4.5
Tequendama	1TEQT42C	44	237.7	37.2	31.6	C	48.1	-0.7	100.961
